# Supplementary material
Source: publisher site journal article supplement (https://www.dovepress.com/article/207016)
Supplement: Supplementary file 1 [file get_supplementary_file.php]

# Supplementary materials document

## Appendix

### PUBMED search equation

Search (((((((((emergence agitation) OR (Delirium and Emergence)) OR (Anesthesia and Emergence and Delirium)) OR (Emergence and Excitement)) OR (Postanesthetic and Excitement)) OR (Agitated and Emergence)) OR (Emergence and Agitation))) AND (((((((MPV-1440) OR MPV 1440) OR MPV1440) OR Precedex) OR Hospira Brand of Dexmedetomidine Hydrochloride) OR Dexmedetomidine Hydrochloride) OR (Hydrochloride and Dexmedetomidine)) Sort by: [relevance]

### Cochrane Library search equation

#4 emergence agitation or Delirium and Emergence or Anesthesia and Emergence and Delirium or Emergence and Excitement or Postanesthetic and Excitement (Word variations have been searched)

#5 Agitated and Emergence or Emergence and Agitation or emergence delirium (Word variations have been searched)

#6 #4 or #5

#7 MPV-1440 or MPV 1440 or MPV1440 or Precede or Hospira Brand of Dexmedetomidine Hydrochloride (Word variations have been searched)

#8 Dexmedetomidine Hydrochloride or Hydrochloride and Dexmedetomidine or Dexmedetomidine (Word variations have been searched)

#9 #7 or #8

#10 #6 and #9

### Web of Science search equation

#1 TS= (Dexmedetomidine Hydrochloride) OR TS= (Hydrochloride and Dexmedetomidine) OR

TS= (Hospira Brand of Dexmedetomidine Hydrochloride) OR TS=(Precedex) OR TS=(MPV1440)

OR TS=(MPV1440) OR TS= (MPV 1440) OR TS=(MPV-1440)

#2 TS= (emergence agitation) OR TS= (Delirium and Emergence) OR TS= (Anesthesia and

Emergence and Delirium) OR TS= (Emergence and Excitement) OR TS= (Postanesthetic and

Excitement) OR TS= (Agitated and Emergence) OR TS= (Emergence and Agitation)

#3 #1 AND #2

### **Embase search equation**

#1 emergence AND agitation OR (agitated AND emergence) OR (emergence AND delirium) OR

(emergence AND excitement) OR (postanaesthetic AND excitement) OR (postanesthetic AND

excitement)

#2 cepedex OR dexamedetomidine OR dexdomitor OR dexdor OR (dexmedetomidine AND

hydrochloride) OR (mpv AND 1440) OR mpv1440 OR precedex OR primadex OR sedadex OR

dexmedetomidine

#3 #1 AND #2

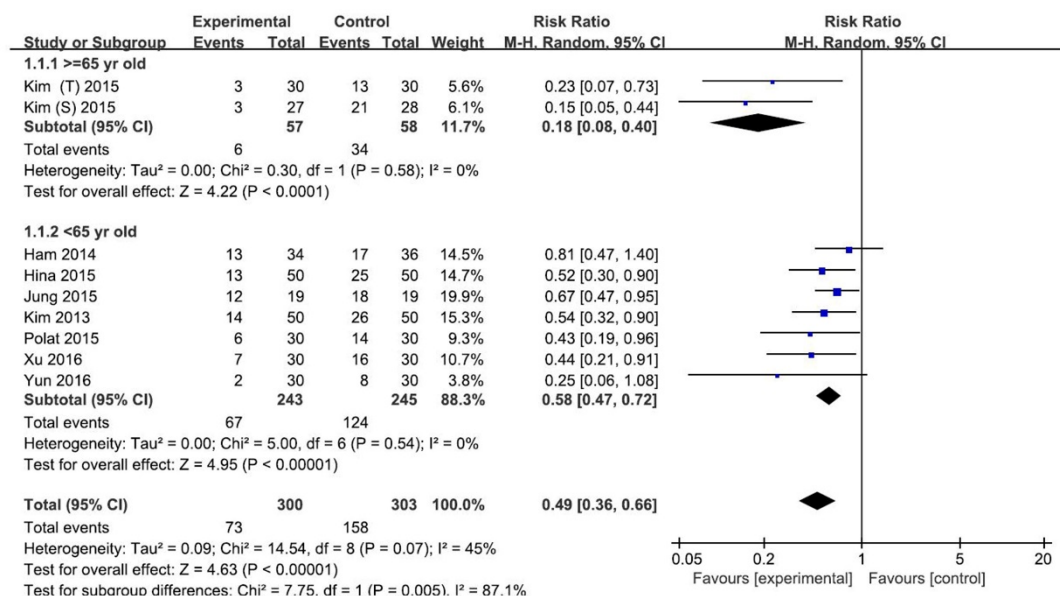

**Supplementary Figure.1** Meta-analysis of risk ratios for the efficacy of dexmedetomidine vs placebo in difference age levels.

**Supplementary Table 1.** Meta-regression Analysis.

| Moderator                                          | Coefficient<br>(95% CI)                 | P            | Adjusted R <sup>2</sup> % |
|----------------------------------------------------|-----------------------------------------|--------------|---------------------------|
| Sample size                                        | 1.608<br>(0.870 to 2.973)               | 0.116        | 31.36                     |
| Type of anesthesia                                 | 2.358<br>(0.670 to 8.300)               | 0.16         | 79.57                     |
| <b>Timing of administration of dexmedetomidine</b> | <b>1.389</b><br><b>(1.052 to 1.859)</b> | <b>0.026</b> | <b>100</b>                |

**Note:** Meta-regression of sample size, type of anesthesia, administration of Dex. The adjusted R2 shows the relative change in heterogeneity. Only bold indicates significant results (P<0.05).

**Abbreviations:** Dex., Dexmedetomidine; CI, confidence intervals.

**Supplemental Table 2.** Meta-analysis of Secondary Outcomes.

| Outcome                 | Studies | Participants | Statistical Method       | Effect Estimate          | P1     | I <sup>2</sup> (%) | P2   |
|-------------------------|---------|--------------|--------------------------|--------------------------|--------|--------------------|------|
| 2.1 Time to extubation  | 4       | 280          | SMD (IV, Random, 95% CI) | 0.26<br>(0.03 to 0.50)   | 0.03   | 0                  | 0.9  |
| 2.2 Length of PACU stay | 7       | 473          | SMD (IV, Random, 95% CI) | -0.12<br>(-0.36 to 0.13) | 0.35   | 43                 | 0.10 |
| 2.3 Analgesics in PACU  | 7       | 528          | RR (M-H, Random, 95% CI) | 0.66<br>(0.51 to 0.84)   | 0.0009 | 0                  | 0.45 |
| 2.4 Residual sedation   | 4       | 330          | RR (M-H, Random, 95% CI) | 1.98<br>(0.64 to 6.16)   | 0.24   | 0                  | 0.24 |
| 2.5 PONV                | 12      | 842          | RR (M-H, Random, 95% CI) | 0.72<br>(0.45 to 1.15)   | 0.17   | 16                 | 0.30 |
| 2.6 Bradycardia         | 7       | 559          | RR (M-H, Random, 95% CI) | 4.48<br>(0.99 to 20.25)  | 0.05   | 0                  | 0.97 |
| 2.7 Hypotension         | 9       | 689          | RR (M-H, Random, 95% CI) | 2.37<br>(1.08 to 5.21)   | 0.03   | 34                 | 0.18 |

**Abbreviations:** SMD, standard mean difference; IV, Inverse Variance; CI, confidence interval; RR, Risk Ratio; M-H, Mantel Haenszel; PONV, postoperative nausea and vomiting; PACU, post anesthesia care unit; P1, P value for statistical significance of effect estimate; I<sup>2</sup>, test for heterogeneity; P2, P value for statistical significance of heterogeneity.

**Supplementary Table 3.** Results of sensitivity analysis.

| <b>Outcome</b>                                       | <b>Description of Analysis</b> | <b>Number of Studies</b> | <b>Number of Patients</b> | <b>Effect Estimate (95% CI)</b> | <b>P</b> | <b>I<sup>2</sup></b> |
|------------------------------------------------------|--------------------------------|--------------------------|---------------------------|---------------------------------|----------|----------------------|
| <b>Time to extubation</b>                            | All included                   | 5                        | 380                       | 0.97<br>(-0.17 to 2.11)         | 0.09     | 96                   |
|                                                      | Lee et al removed              | 4                        | 280                       | 0.26<br>(0.03 to 0.50)          | 0.03     | 0                    |
|                                                      | Xu et al removed               | 3                        | 220                       | 0.25<br>(-0.02 to 0.51)         | 0.07     | 0                    |
|                                                      | Yun et al removed              | 3                        | 220                       | 0.31<br>(0.04 to 0.57)          | 0.02     | 0                    |
|                                                      | Polat et al removed            | 3                        | 220                       | 0.25<br>(-0.01 to 0.52)         | 0.06     | 0                    |
|                                                      | Kim et al removed              | 3                        | 180                       | 0.23<br>(-0.07 to 0.52)         | 0.13     | 0                    |
| <b>Length of PACU stay</b>                           | All included                   | 7                        | 473                       | -0.12<br>(-0.36 to 0.13)        | 0.35     | 43                   |
|                                                      | Jung et al removed             | 6                        | 435                       | -0.16<br>(-0.42 to 0.09)        | 0.22     | 44                   |
|                                                      | Kim(S) et al removed           | 6                        | 418                       | -0.12<br>(-0.41 to 0.17)        | 0.42     | 53                   |
|                                                      | Kim(T) et al removed           | 6                        | 413                       | -0.16<br>(-0.43 to 0.11)        | 0.24     | 45                   |
|                                                      | Polat et al removed            | 6                        | 413                       | -0.05<br>(-0.25 to 0.15)        | 0.63     | 5                    |
|                                                      | Kim et al removed              | 6                        | 373                       | -0.13<br>(-0.43 to 0.17)        | 0.39     | 52                   |
|                                                      | Kwon et al removed             | 6                        | 413                       | -0.16<br>(-0.43 to 0.12)        | 0.26     | 47                   |
|                                                      | Lee et al removed              | 6                        | 373                       | -0.06<br>(-0.32 to 0.21)        | 0.68     | 39                   |
| <b>Number of patients requiring rescue analgesia</b> | All included                   | 8                        | 607                       | 0.71<br>(0.58 to 0.88)          | 0.001    | 0                    |
|                                                      | Yang et al removed             | 7                        | 528                       | 0.66<br>(0.51 to 0.84)          | 0.0009   | 0                    |
|                                                      | Hina et al removed             | 7                        | 507                       | 0.72<br>(0.56 to 0.92)          | 0.008    | 9                    |
|                                                      | Jung et al removed             | 7                        | 569                       | 0.72<br>(0.59 to 0.89)          | 0.002    | 0                    |
|                                                      | Xu et al removed               | 7                        | 547                       | 0.73<br>(0.59 to 0.90)          | 0.003    | 0                    |
|                                                      | Polat et al                    | 7                        | 547                       | 0.71                            | 0.001    | 0                    |

|                          |                     |   |     |                         |       |    |
|--------------------------|---------------------|---|-----|-------------------------|-------|----|
|                          | removed             |   |     | (0.58 to 0.88)          |       |    |
|                          | Ham et al removed   | 7 | 537 | 0.70<br>(0.55 to 0.88)  | 0.003 | 7  |
|                          | Kim et al removed   | 7 | 507 | 0.72<br>(0.56 to 0.92)  | 0.008 | 9  |
|                          | Lee et al removed   | 7 | 507 | 0.63<br>(0.40 to 1.00)  | 0.05  | 19 |
| <b>Residual sedation</b> | All included        | 4 | 330 | 1.98<br>(0.64 to 6.16)  | 0.24  | 0  |
|                          | Hina et al removed  | 3 | 230 | 1.80<br>(0.46 to 7.03)  | 0.40  | 16 |
|                          | Polat et al removed | 3 | 270 | 4.60<br>(1.02 to 20.83) | 0.05  | 0  |
|                          | Ham et al removed   | 3 | 260 | 1.55<br>(0.38 to 6.35)  | 0.55  | 7  |
|                          | Kim et al removed   | 3 | 230 | 1.80<br>(0.46 to 7.03)  | 0.40  | 16 |
| <b>Hypotension</b>       | All included        | 9 | 689 | 2.37<br>(1.08 to 5.21)  | 0.03  | 34 |
|                          | Hina et al removed  | 8 | 589 | 2.37<br>(1.08 to 5.21)  | 0.03  | 34 |
|                          | Kai et al removed   | 8 | 629 | 2.37<br>(1.08 to 5.21)  | 0.03  | 34 |
|                          | Palot et al removed | 8 | 629 | 2.37<br>(1.08 to 5.21)  | 0.03  | 34 |
|                          | Yun et al removed   | 8 | 629 | 2.68<br>(1.07 to 6.69)  | 0.04  | 37 |
|                          | Ham et al removed   | 8 | 619 | 1.53<br>(0.73 to 3.24)  | 0.26  | 0  |
|                          | Kim et al removed   | 8 | 589 | 2.47<br>(0.90 to 6.79)  | 0.08  | 41 |
|                          | Kwon et al removed  | 8 | 629 | 2.50<br>(0.99 to 6.32)  | 0.05  | 43 |
|                          | Lee et al removed   | 8 | 589 | 2.18<br>(0.90 to 5.26)  | 0.08  | 46 |
|                          | Yang et al removed  | 8 | 610 | 2.69<br>(1.24 to 5.81)  | 0.01  | 32 |
| <b>Bradycardia</b>       | All included        | 7 | 559 | 4.48<br>(0.99 to 20.25) | 0.05  | 0  |
|                          | Hina et al removed  | 6 | 459 | 4.48<br>(0.99 to 20.25) | 0.05  | 0  |
|                          | Xu et al removed    | 6 | 499 | 4.48<br>(0.99 to 20.25) | 0.05  | 0  |

|      |                      |    |     |                         |      |    |
|------|----------------------|----|-----|-------------------------|------|----|
|      | Palot et al removed  | 6  | 499 | 4.48<br>(0.99 to 20.25) | 0.05 | 0  |
|      | Kim et al removed    | 6  | 459 | 4.48<br>(0.99 to 20.25) | 0.05 | 0  |
|      | Kwon et al removed   | 6  | 499 | 3.97<br>(0.45 to 35.25) | 0.22 | 0  |
|      | Lee et al removed    | 6  | 459 | 4.32<br>(0.76 to 24.67) | 0.10 | 0  |
|      | Yang et al removed   | 6  | 480 | 5.00<br>(0.90 to 27.79) | 0.07 | 0  |
| PONV | All included         | 12 | 842 | 0.72<br>(0.45 to 1.15)  | 0.17 | 16 |
|      | Hina et al removed   | 11 | 742 | 0.72<br>(0.42 to 1.20)  | 0.21 | 26 |
|      | Jung et al removed   | 11 | 804 | 0.72<br>(0.45 to 1.15)  | 0.17 | 16 |
|      | Xu et al removed     | 11 | 782 | 0.71<br>(0.40 to 1.24)  | 0.23 | 26 |
|      | Kim(S) et al removed | 11 | 787 | 0.67<br>(0.37 to 1.21)  | 0.18 | 23 |
|      | Kim(T) et al removed | 11 | 782 | 0.72<br>(0.42 to 1.21)  | 0.21 | 26 |
|      | Yun et al removed    | 11 | 782 | 0.72<br>(0.45 to 1.15)  | 0.17 | 16 |
|      | Palot et al removed  | 11 | 782 | 0.77<br>(0.51 to 1.16)  | 0.22 | 0  |
|      | Ham et al removed    | 11 | 772 | 0.67<br>(0.42 to 1.07)  | 0.09 | 12 |
|      | Kim et al removed    | 11 | 742 | 0.80<br>(0.50 to 1.29)  | 0.36 | 11 |
|      | Kwon et al removed   | 11 | 782 | 0.67<br>(0.42 to 1.07)  | 0.10 | 14 |
|      | Lee et al removed    | 11 | 742 | 0.77<br>(0.51 to 1.17)  | 0.22 | 0  |
|      | Yang et al removed   | 11 | 763 | 0.69<br>(0.40 to 1.19)  | 0.18 | 25 |

**Abbreviations:** SMD, standard mean difference; IV, Inverse Variance; CI, confidence interval; RR, Risk Ratio; M-H, Mantel Haenszel; PONV, postoperative nausea and vomiting; PACU, post anesthesia care unit; P1, P value for statistical significance of effect estimate; I2, test for heterogeneity. The red font indicates that the result was not robust.

**Supplementary Table 4.** Pain Score and Analgesics in PACU.

| Study                             | Assessment of pain | Pain score in PACU |            | P     | Analgesics in PACU                 | Number of patients need for analgesias in PACU<br>Dex / Con |
|-----------------------------------|--------------------|--------------------|------------|-------|------------------------------------|-------------------------------------------------------------|
|                                   |                    | Dex                | Con        |       |                                    |                                                             |
| Polat et al <sup>29</sup> (2015)  | VAS                | 20 (20–30)         | 30 (20–30) | 0.002 | Fentanyl 1 µg kg <sup>-1</sup>     | 0/0                                                         |
| Kim et al <sup>28</sup> (2013)    | NRS                | 2 (0–6)            | 2 (0–8)    | 0.061 | Fentanyl 1 µg kg <sup>-1</sup>     | 4/8                                                         |
| Kim et al <sup>2</sup> (S) (2015) | VAS                | 5.3 (±1.9)         | 6.6 (±1.9) | 0.011 | ?                                  | ?                                                           |
| Kim et al <sup>2</sup> (T) (2015) | VAS                | 5.1 (±1.6)         | 5.7 (±2.1) | 0.246 | ?                                  | ?                                                           |
| Xu et al <sup>47</sup> (2016)     | VAS                | 2.2(±1.4)          | 3.1(±1.7)  | 0.039 | Fentanyl 0.5-1 µg kg <sup>-1</sup> | 2/8                                                         |
| Lee et al <sup>30</sup> (2016)    | NRS                | 4 (2–10)           | 7 (2–10)   | 0.001 | Fentanyl                           | 29/41                                                       |
| Ham et al <sup>17</sup> (2014)    | NRS                | 0 (0-2)            | 2 (0-4.5)  | 0.046 | Fentanyl 1 µg kg <sup>-1</sup>     | 2/1                                                         |
| Hina et al <sup>48</sup> (2015)   | NRS                | ?                  | ?          | ?     | 25 µg fentanyl                     | 4/8                                                         |
| Jung et al <sup>26</sup> (2015)   | NRS                | 6                  | 13         | 0.050 | Fentanyl 0.5 µg kg <sup>-1</sup>   | 2/6                                                         |

**Note:** Data of pain score are presented as median (range) in the studies of Polat et al and Kim et al, as median (Interquartile Range) in the studies of Lee et al and Ham et al; Jung et al just recorded the number of patients whose NRS  $\geq$ 4; and others are presented as mean ( $\pm$  SD).

**Abbreviations:** PACU, post anesthesia care unit; Dex, Dexmedetomidine; Con, Control; VAS, visual analogue score; NRS, numeric rating scale; ?, unknown.
